# Supplementary material for: dNAGLU Extends Life Span and Promotes Fitness and Stress Resistance in Drosophila
Source: MDPI journal article supplement (doi:10.3390/ijms232214433), 2022-11-20
Supplement: s1 [file s1]

# Supplementary Data

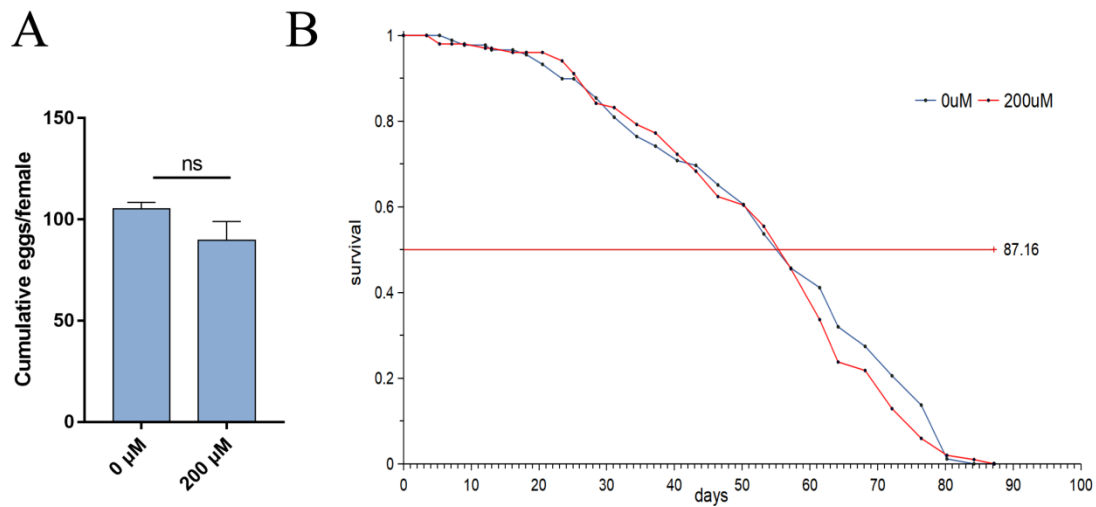

**Supplementary Figure S1. Effects of 200 μM RU486 on the fecundity and lifespan in *Drosophila*:** (A) fecundity evaluation of *w<sup>1118</sup>* flies,  $p = 0.0504$ ; (B) survival curves generated from life statistics of *w<sup>1118</sup>* flies,  $p = 0.3471$ . ns represents non-significant. All survival data were analyzed with the log-rank test.

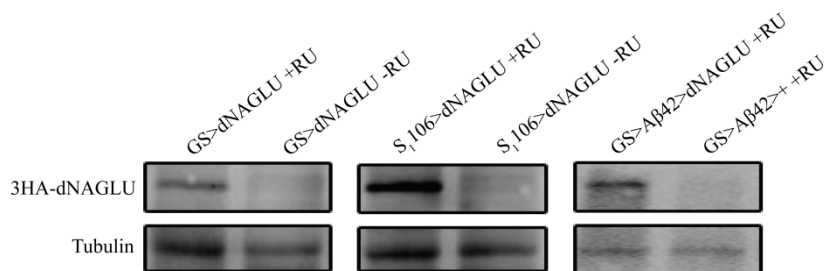

**Supplementary Figure S2. Western Blot detection of 3HA-dNAGLU expression.**

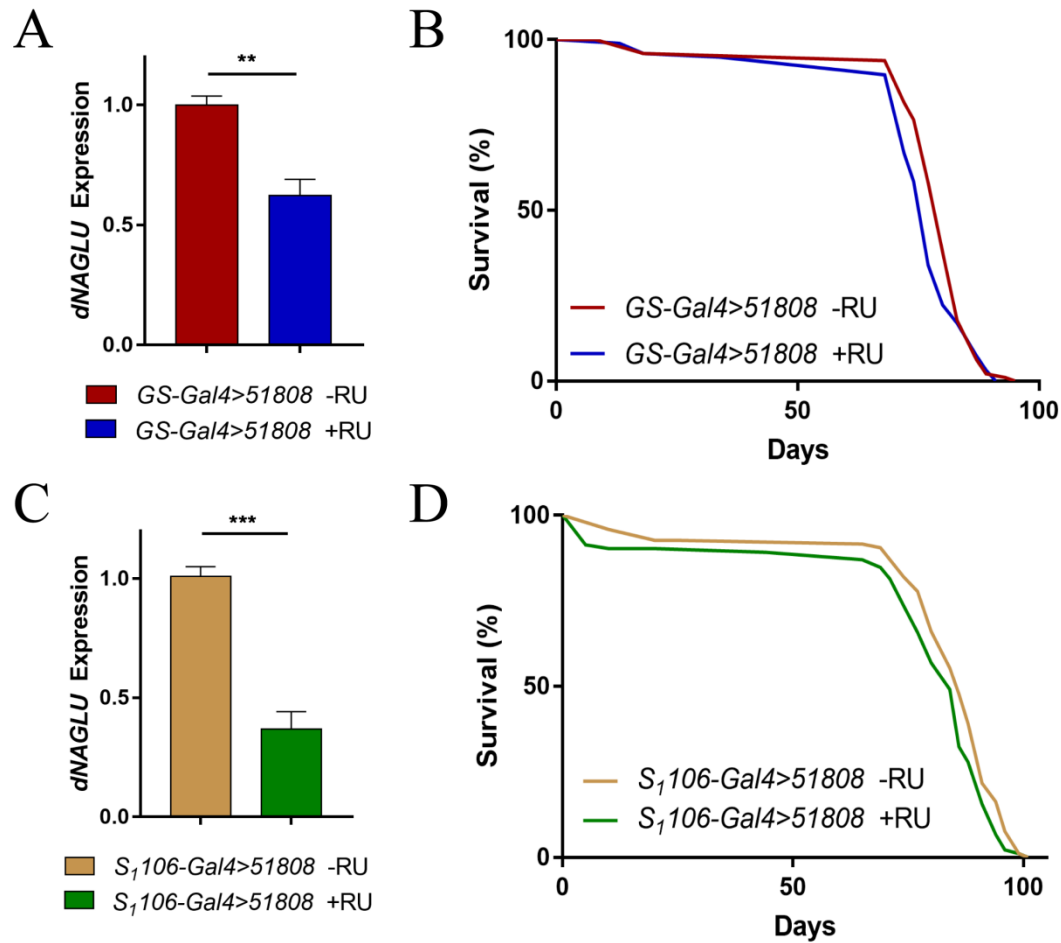

**Supplementary Figure S3. Effects of *dNAGLU* knockdown on the lifespan in *Drosophila*:**

**(A)** qRT-PCR validation for expression of *dNAGLU* in *Drosophila* whole body; **(B)** survival curves when *dNAGLU* was knocked down in *Drosophila* whole body,  $p = 0.0374$ ; **(C)** qRT-PCR validation for expression of *dNAGLU* in *Drosophila* fat body; **(D)** survival curves when *dNAGLU* was knocked down in *Drosophila* whole body,  $p = 0.0392$ . \*\*  $p < 0.01$ , \*\*\*  $p < 0.001$ . All survival data were analyzed with the log-rank test.

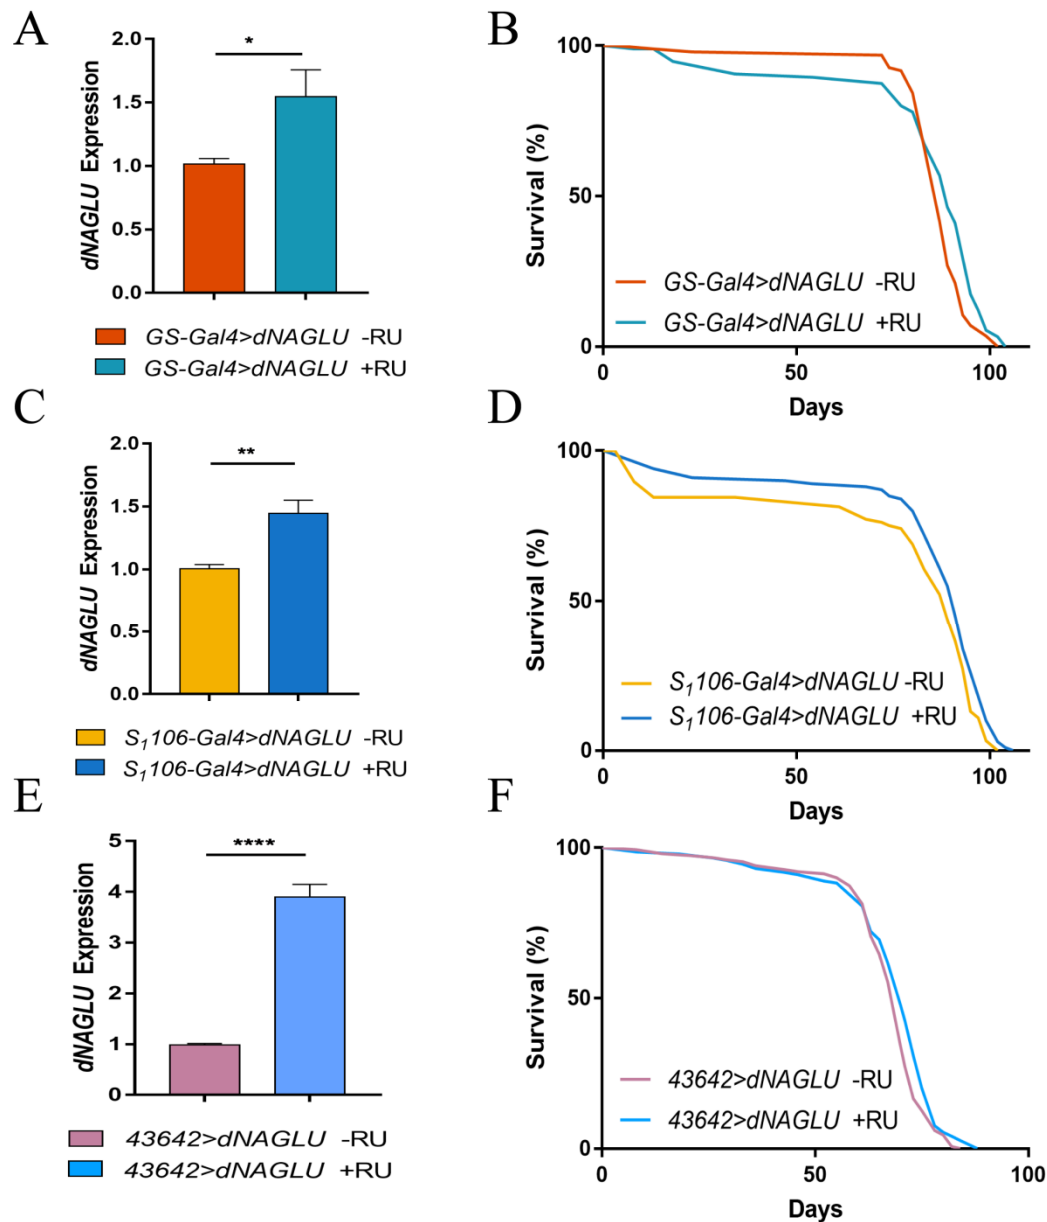

**Supplementary Figure S4. Repeated experiment of *dNAGLU* overexpression on the lifespan in *Drosophila*:** (A) qRT-PCR validation for expression of *dNAGLU* in *Drosophila* whole body; (B) survival curves of overexpressing *dNAGLU* in *Drosophila* whole body,  $p = 0.0235$ ; (C) qRT-PCR validation for expression of *dNAGLU* in *Drosophila* fat body; (D) survival curves of overexpressing *dNAGLU* in *Drosophila* fat body,  $p = 0.0244$ ; (E) qRT-PCR validation for expression of *dNAGLU* in *Drosophila* nervous system; (F) survival curves of overexpressing *dNAGLU* in *Drosophila* nervous system,  $p = 0.0259$ . A 5% or lower P value is considered to be statistically significant using Student's t-test, \* $p < 0.05$ , \*\*  $p < 0.01$ , \*\*\*\*  $p < 0.0001$ . All survival data were analyzed with the log-rank test.

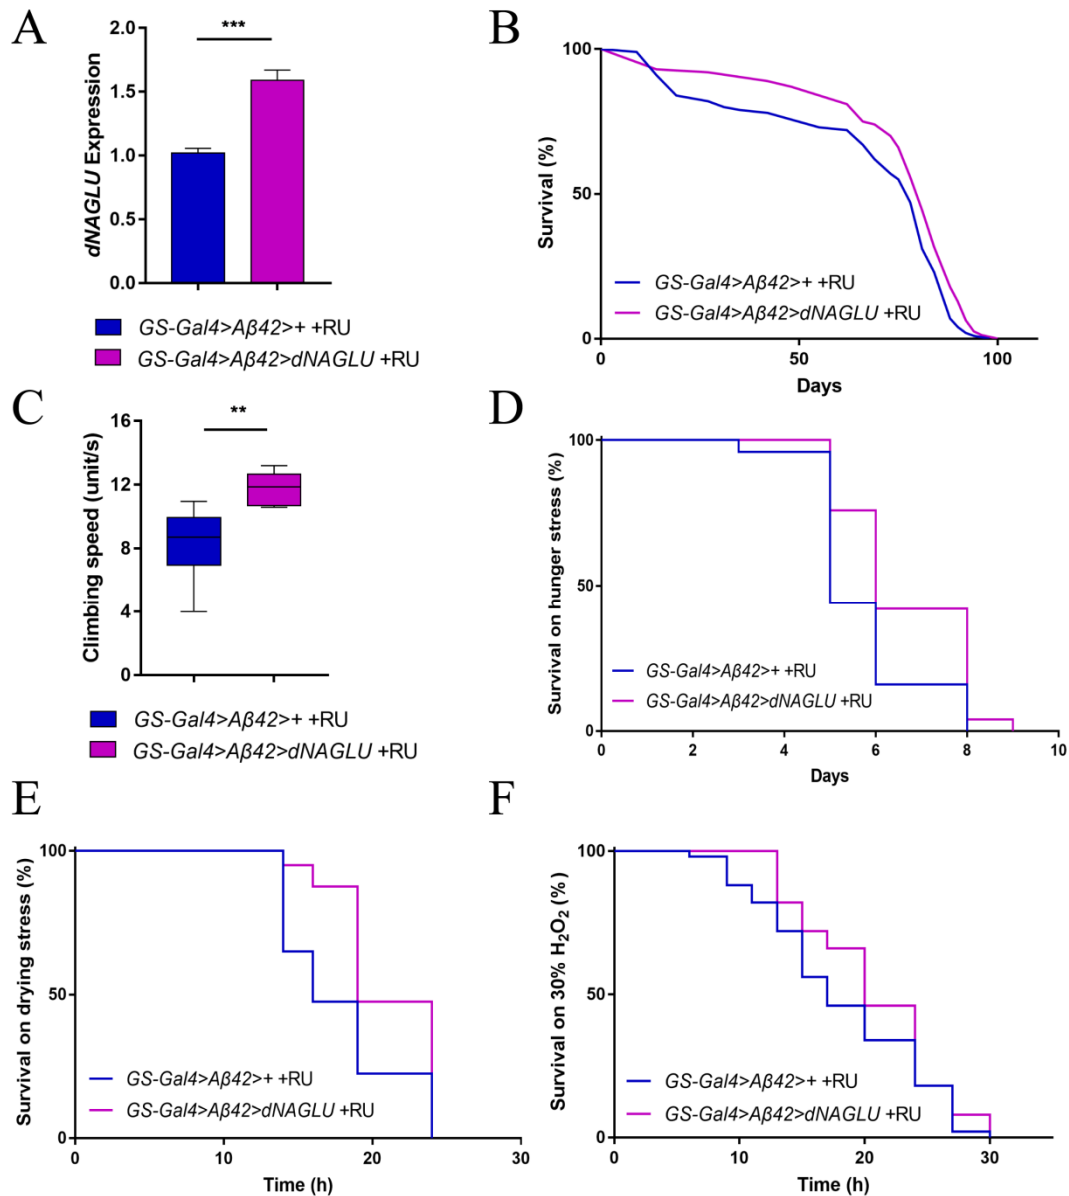

**Supplementary Figure S5. Repeated experiment of *dNAGLU* overexpression on the lifespan in *Drosophila* AD models:** (A) qRT-PCR validation for expression of *dNAGLU* in AD flies (\*\* $p < 0.001$ , t-test); (B) survival curve of *Drosophila* overexpressing *dNAGLU* in AD flies ( $p = 0.0196$ , log-rank test); (C-F) effects of *dNAGLU* overexpression on stress tolerance in AD flies; (C) climbing assay, (\*\* $p < 0.01$ , t-test); (D) hunger stress assay, ( $p = 0.0003$ , log-rank test); (E) desiccation stress assay, ( $p = 0.0008$ , log-rank test); (F) H<sub>2</sub>O<sub>2</sub> stress assay, ( $p = 0.1130$ , log-rank test).

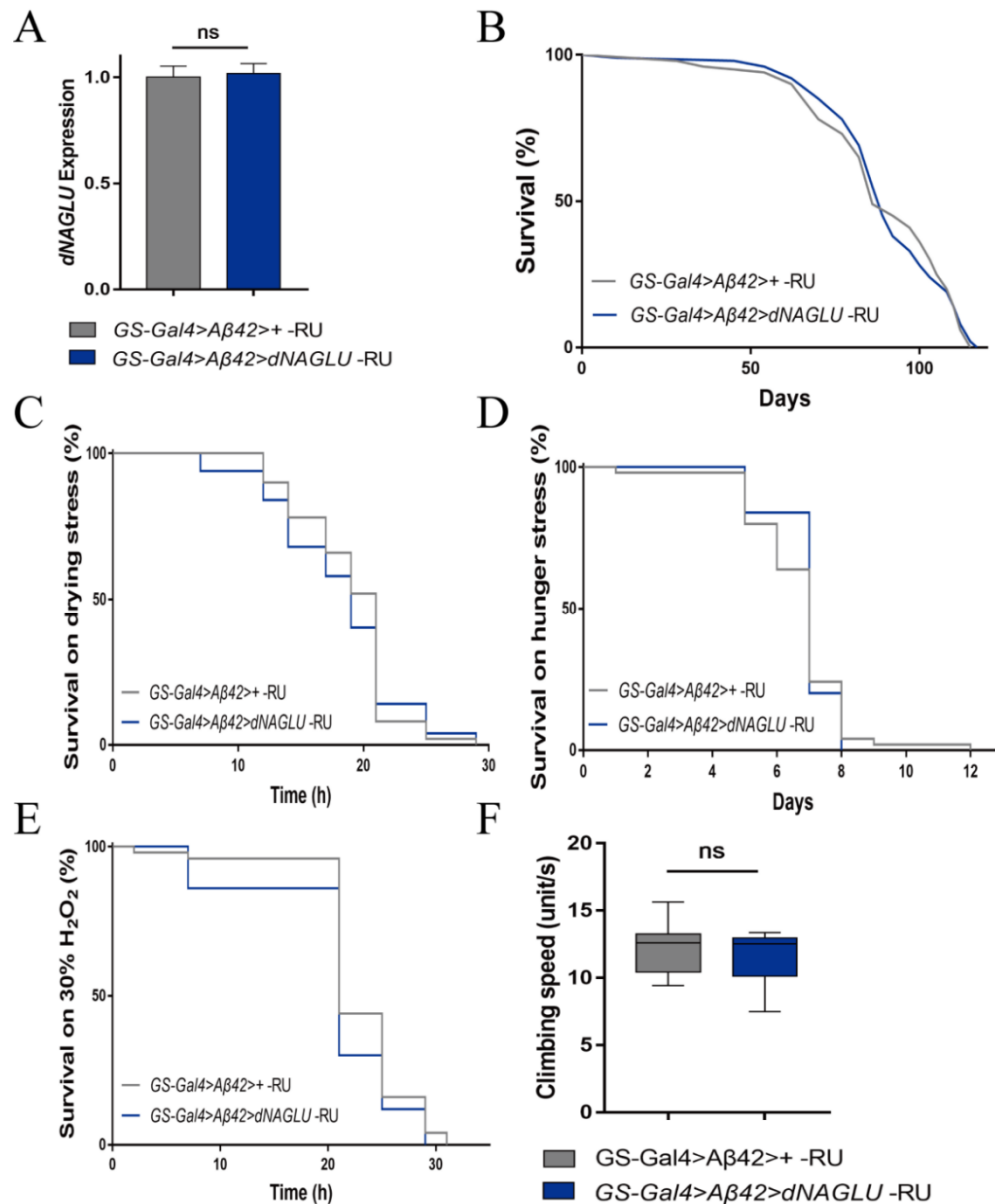

**Supplementary Figure S6. There were no significant differences between the *GS>Aβ42>dNAGLU -RU* flies and *GS>Aβ42>+ -RU* flies:** (A) qRT-PCR validation for expression of *dNAGLU* ( $p = 0.6929$ , t-test); (B) survival curve ( $p = 0.8473$ ); (C-F) effects on stress tolerance; (C) desiccation stress  $p = 0.5964$ ; (D) hunger stress,  $p = 0.5709$ ; (E)  $H_2O_2$  stress,  $p = 0.0872$ ; (F) climbing ability,  $p = 0.5489$ . ns represents non-significant. All survival data were analyzed with the log-rank test.

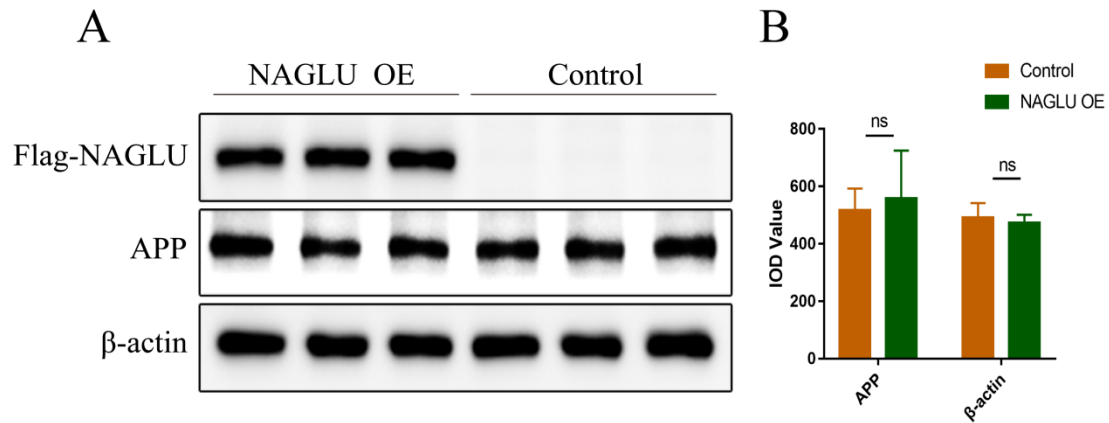

**Supplementary Figure S7. Western Blot detection when *NAGLU* overexpressed in U251-APP cells:** (A) Western Blot detection of Flag-NAGLU, APP and β-actin; (B) IOD value of APP and β-actin. ns represents non-significant.

**Table S1.** Primers used in the cloning and qRT-PCR.

| Primer    | Sequence                                                                |
|-----------|-------------------------------------------------------------------------|
| dNAGLU-F  | GCTGAATTCGTTAACAGATCTATGCAGCTGAATTGGAAGCTG                              |
| dNAGLU-R  | CAAAGATCCTCTAGAGGTACCTTATTTAGGTCCCGCTTTTGTAG                            |
| dNAGLU-qF | AGCTGAAAGTCTCGCACGAA                                                    |
| dNAGLU-qR | GCGTGTCTTAGAGTAGCCC                                                     |
| NAGLU-F   | GATTCTAGAGCTAGCGAATTCATGGACTACAAAGACGATGACGAC<br>AAGATGGAGGCGGTGGCGGTGG |
| NAGLU-R   | ATCCTTCGCGGCCGCGGATCCTCACCAAGAGCCGGCCACCCAG                             |
| NAGLU-qF  | CTACCTGCGCGACTTCTGTG                                                    |
| NAGLU-qR  | GGTAGGCGTCTTCTTTCCGT                                                    |
| GAPDH-F   | GAGCCCGCAGCCTCCCGCTT                                                    |
| GAPDH-R   | CCCGCGGCCATCACGCCACAG                                                   |
| Tubulin-F | GCTTTCCCAAGAAGCTCATACA                                                  |
| Tubulin-R | GGTTCAGTGCGGTATTATCCAG                                                  |
| Actin5C-F | CGGTATCGTTCTGGACTCCG                                                    |
| Actin5C-R | GCGGTGGTGGTGAAAGAGTA                                                    |
| CTSB-F    | AGAGTTATGTTTACCGAGGACCT                                                 |

---

|         |                         |
|---------|-------------------------|
| CTSB-R  | GATGCAGATCCGGTCAGAGA    |
| CTSD-F  | TGCTCAAGAACTACATGGACGC  |
| CTSD-R  | CGAAGACGACTGTGAAGCACT   |
| CTSK-F  | ACACCCACTGGGAGCTATG     |
| CTSK-R  | GACAGGGGTACTTTGAGTCCA   |
| CTSL-F  | CTTTTGCCTGGGAATTGCCTC   |
| CTSL-R  | CATCGCCTTCCACTTGGTC     |
| TPP1-F  | CCTCCACACGGTGCAAAAATG   |
| TPP1-R  | CTCTGCTTGTCGGATGCTCAG   |
| MMP-2-F | TACAGGATCATTGGCTACACACC |
| MMP-2-R | GGTCACATCGCTCCAGACT     |
| MMP-9-F | TGTACCGCTATGGTTACACTCG  |
| MMP-9-R | GGCAGGGACAGTTGCTTCT     |
| ACE-F   | GGAGGAATATGACCGGACATCC  |
| ACE-R   | TGGTTGGCTATTTGCATGTTCTT |
| TFEB-F  | ACCTGTCCGAGACCTATGGG    |
| TFEB-R  | CGTCCAGACGCATAATGTTGTC  |
| TFE3-F  | CCGTGTTCTGTGCTGTTGGA    |
| TFE3-R  | GCTCGTAGAAGCTGTCAGGAT   |

---
